# Supplementary figures and images for: COVID-19-related acute kidney injury; temporal changes in incidence rate and outcomes in a large UK cohort
Source: Research Square preprint supplement (doi:10.21203/rs.3.rs-438237/v1), 2021-04-30

**Suppl. Figure 1. Study flow chart**


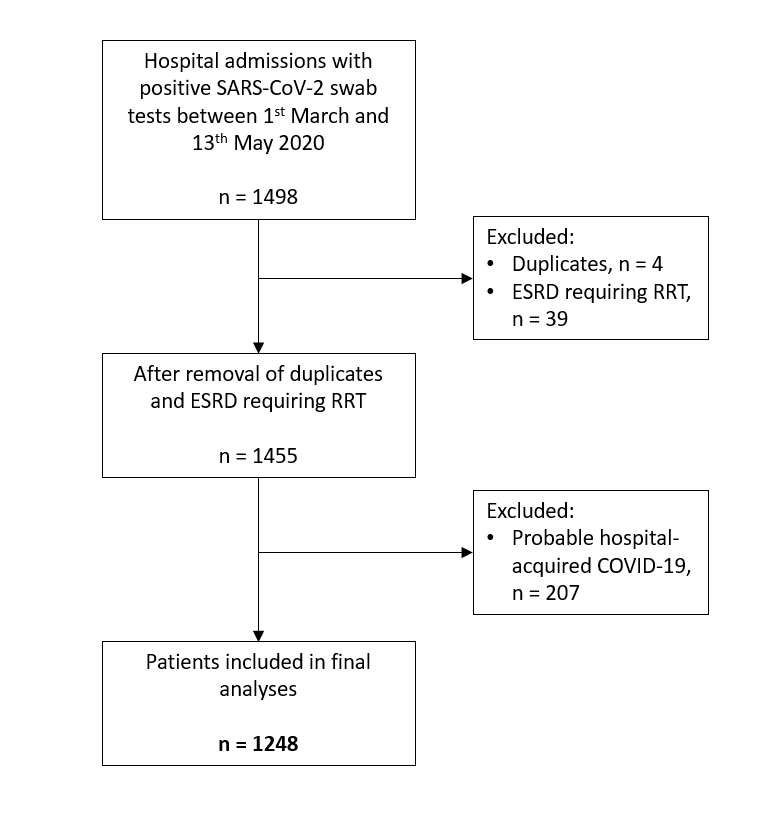

Supplement: Supplementary file 1 [file 8e2bfda2a06091522f6b00a8.docx]
